# Supplementary material for: Enhanced electrochemical performance of aqueous Zn-ion batteries based on Na 2 V 6 O 16 ·2H 2 O cathodes: insights from DFT and synchrotron X-ray analysis
Source: Royal Society of Chemistry journal article supplement (doi:10.1039/d4ta08338e), 2025-01-01
Supplement: d4ta08338e2.pdf [file d4ta08338e2.pdf]

## ***Supporting Information for***

# Enhanced Electrochemical Performance of Aqueous Zn-Ion Batteries Based on $\text{Na}_2\text{V}_6\text{O}_{16}\cdot 2\text{H}_2\text{O}$ Cathodes: Insights from DFT and Synchrotron X-ray Analysis

Younghee So<sup>1,‡</sup>, Hunchol Seo<sup>2,‡</sup>, Seung Hwan Lee<sup>3,‡</sup>, Eunseo Lee<sup>1,4</sup>, Jinyoung Lee<sup>1,4</sup>,  
Joonhee Kang<sup>5</sup>, Young Yong Kim<sup>6,\*</sup>, Byung-Hyun Kim<sup>2,7,\*</sup>, Sungwook Mhin<sup>1,4,\*</sup>

<sup>1</sup>Department of Materials Science and Engineering, Kyonggi University, Suwon 16227, Republic of Korea

<sup>2</sup>Department of Applied Chemistry, Center for Bionano Intelligence Education and Research, Hanyang University  
ERICA, Ansan 15588, Republic of Korea

<sup>3</sup>School of Mechanical Engineering, Hanyang University, 222 Wangsimni-Ro, SeongDong-Gu, Seoul, 04763,  
Republic of Korea

<sup>4</sup>Department of Energy and Materials Engineering, Dongguk University-Seoul, Seoul 04620, Republic of Korea

<sup>5</sup>Department of Nanoenergy Engineering, Pusan National University, Busan 46241, Republic of Korea

<sup>6</sup>Beamline Division, Pohang Accelerator Laboratory, POSTECH, Pohang 37673, Republic of Korea

<sup>7</sup>Department of Chemical and Molecular Engineering, Hanyang University ERICA, Ansan 15588, Republic of  
Korea

\*Correspondence and request for materials should be addressed to S. Mhin ([swmhin@kgu.ac.kr](mailto:swmhin@kgu.ac.kr)), Y. Y. Kim  
([kimyy@postech.ac.kr](mailto:kimyy@postech.ac.kr)), and B.-H. Kim ([bhkim00@hanyang.ac.kr](mailto:bhkim00@hanyang.ac.kr))

**KEYWORDS.** Aqueous zinc-ion battery, charge/discharge cycle, cathode material,  
 $\text{Na}_2\text{V}_6\text{O}_{16}\cdot 2\text{H}_2\text{O}$  (NaVO), sonochemical synthesis.

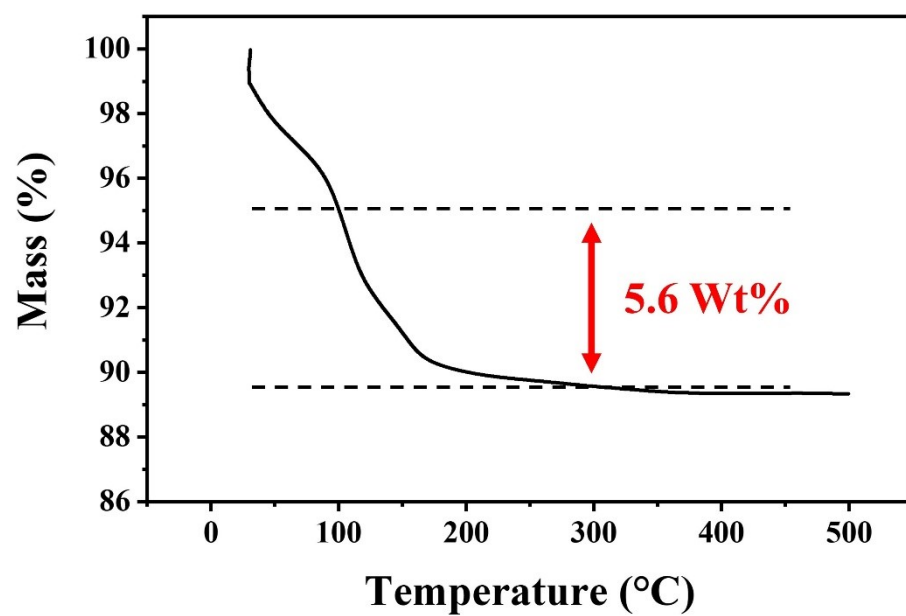

**Figure. S1** TGA curve of NaVO

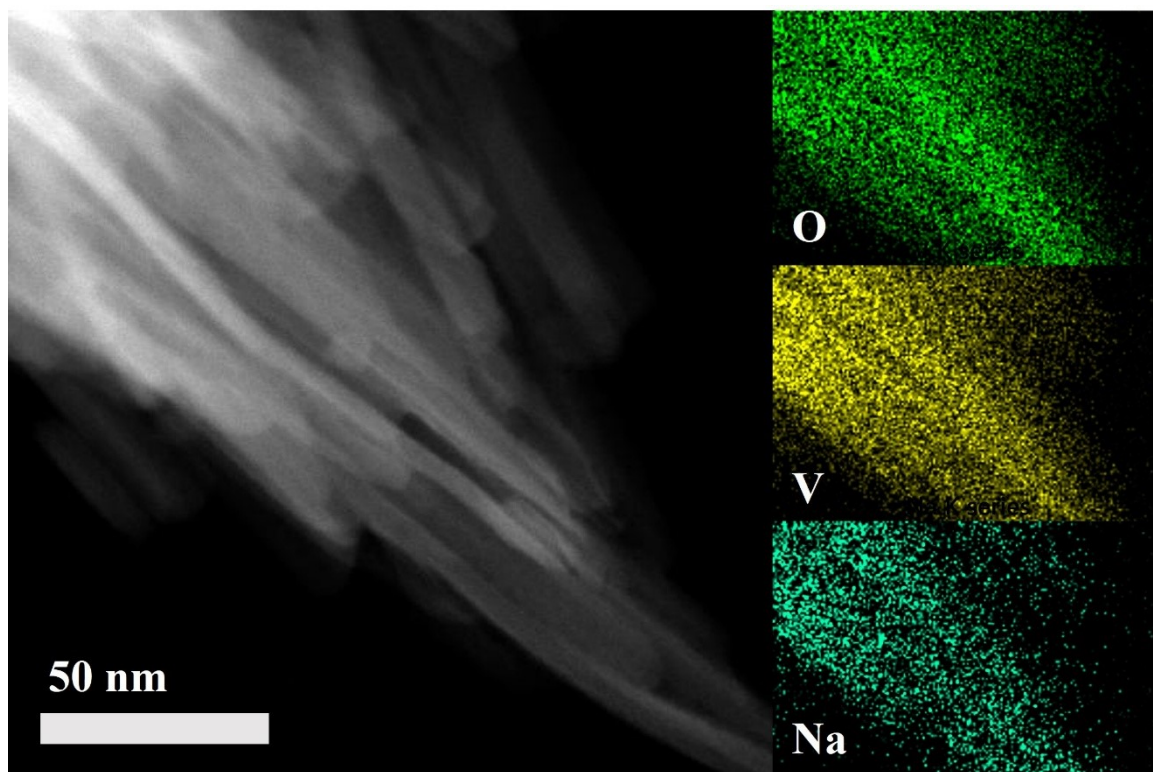

**Figure. S2** TEM image and EDX mapping of NaVO

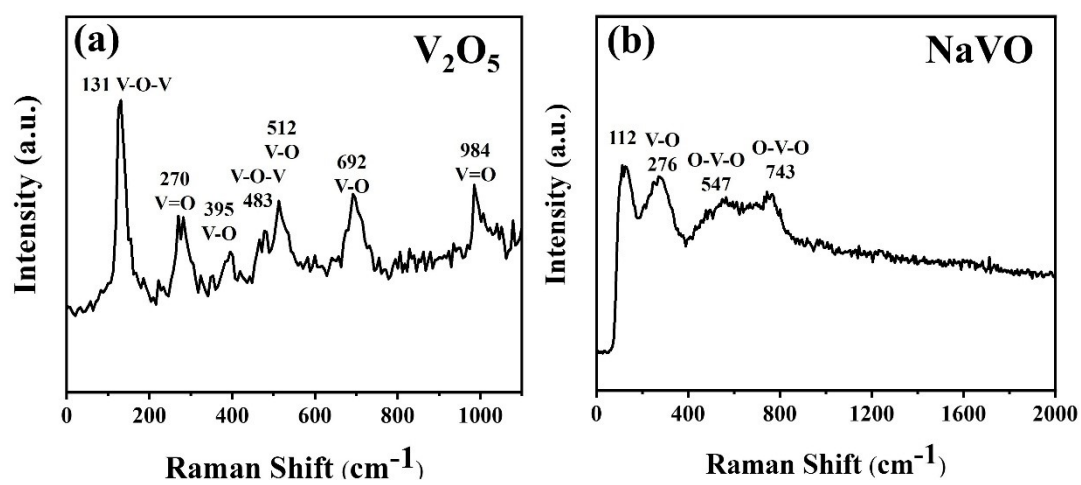

**Fig. S3.** Raman spectra of (a)  $V_2O_5$  and (b) NaVO

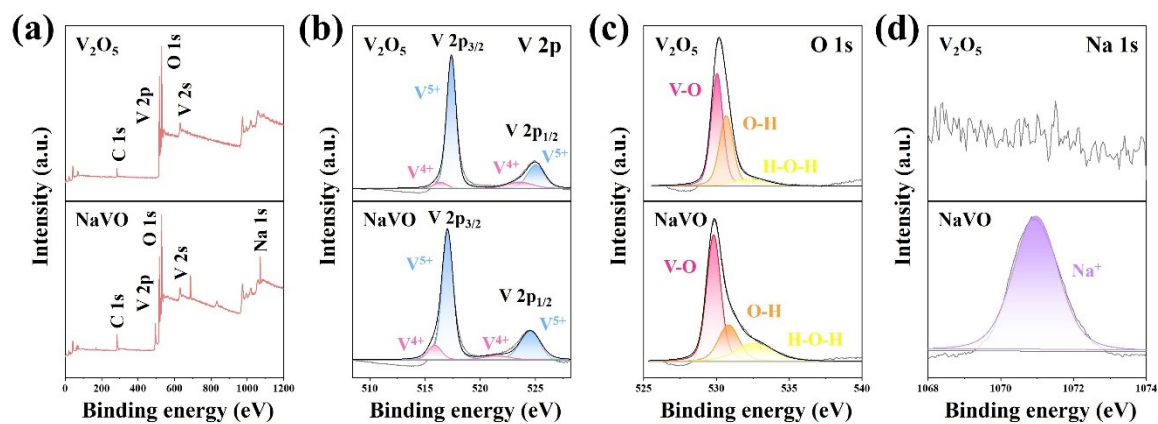

**Figure. S4** Characteristics of the  $V_2O_5$  and  $NaVO$  from XPS spectra. (a) The wide survey scan of  $V_2O_5$  and  $NaVO$ . A narrow scan data and fitted curves of V 2p, O 1s, and Na 1s are shown in (b), (c), and (d), respectively.

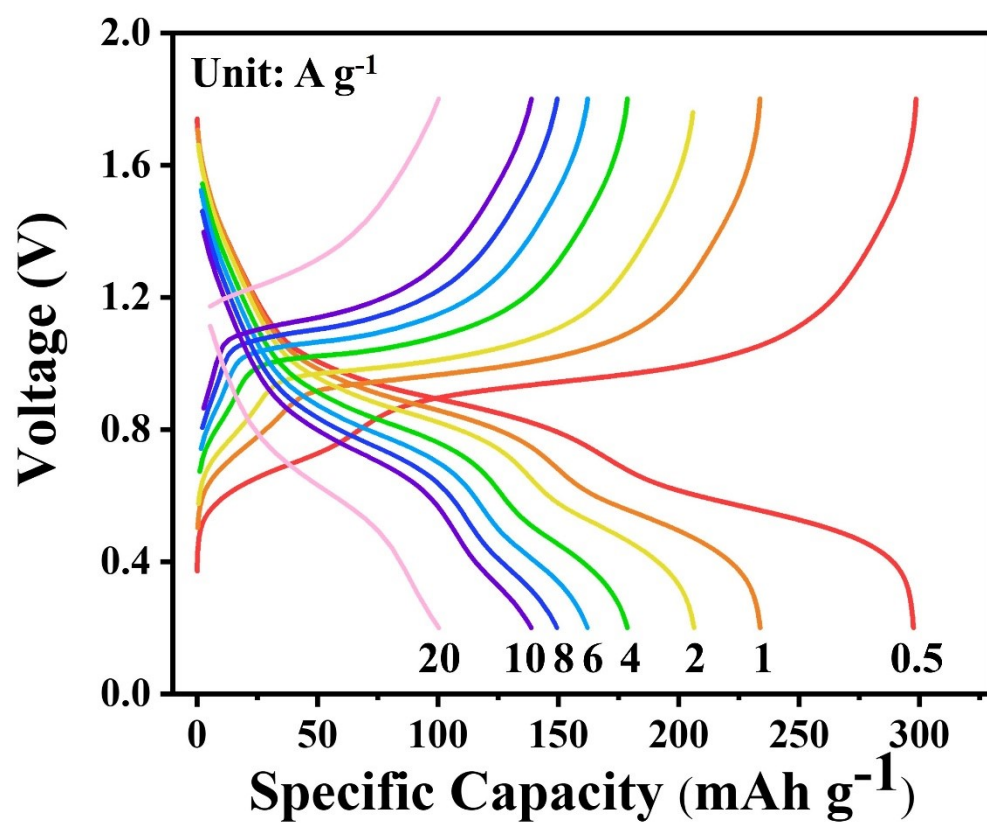

**Figure. S5** Charge/Discharge curve of NaVO//Zn at 0.5, 1, 2, 4, 6, 8, 10 and 20 A g<sup>-1</sup> respectively.

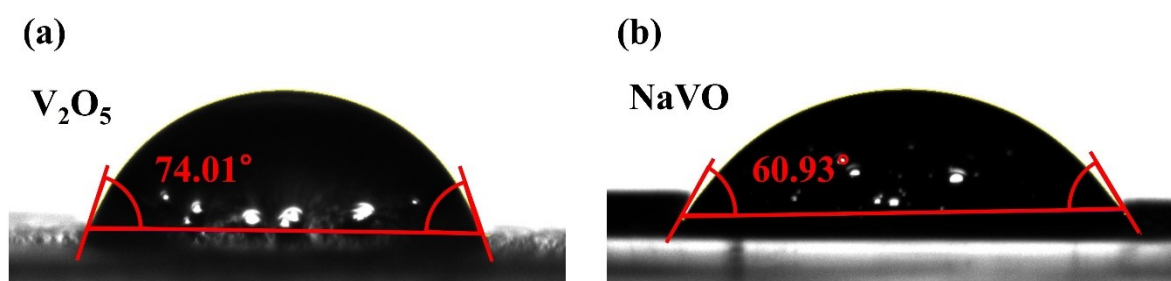

**Figure. S6** The contact angles of electrolyte on (a) V<sub>2</sub>O<sub>5</sub> and (b) NaVO cathode.

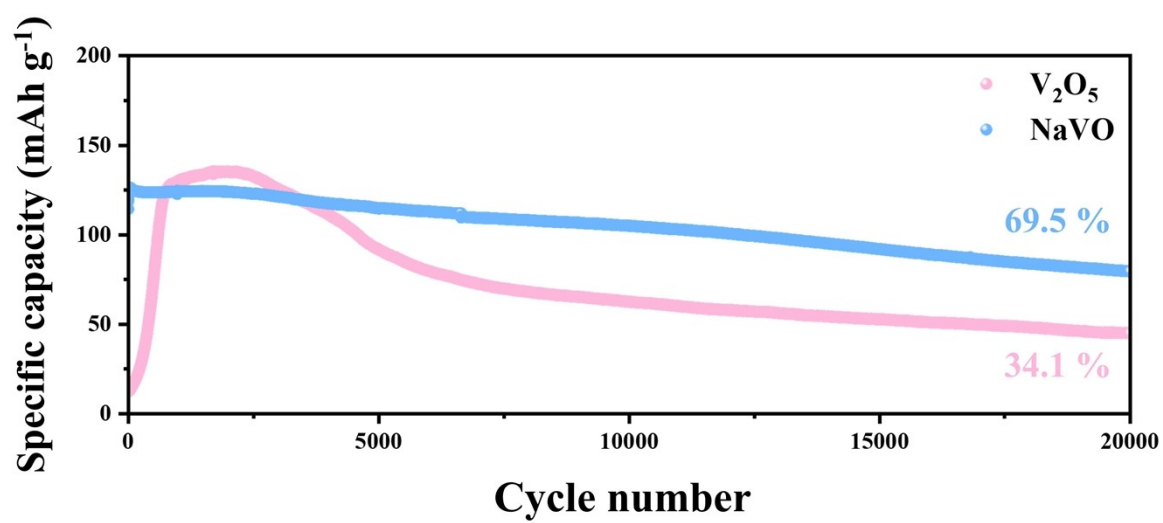

**Figure. S7** Cycling performance of  $\text{NaVO//Zn}$  and  $\text{V}_2\text{O}_5\text{//Zn}$  at  $10\text{A g}^{-1}$ .

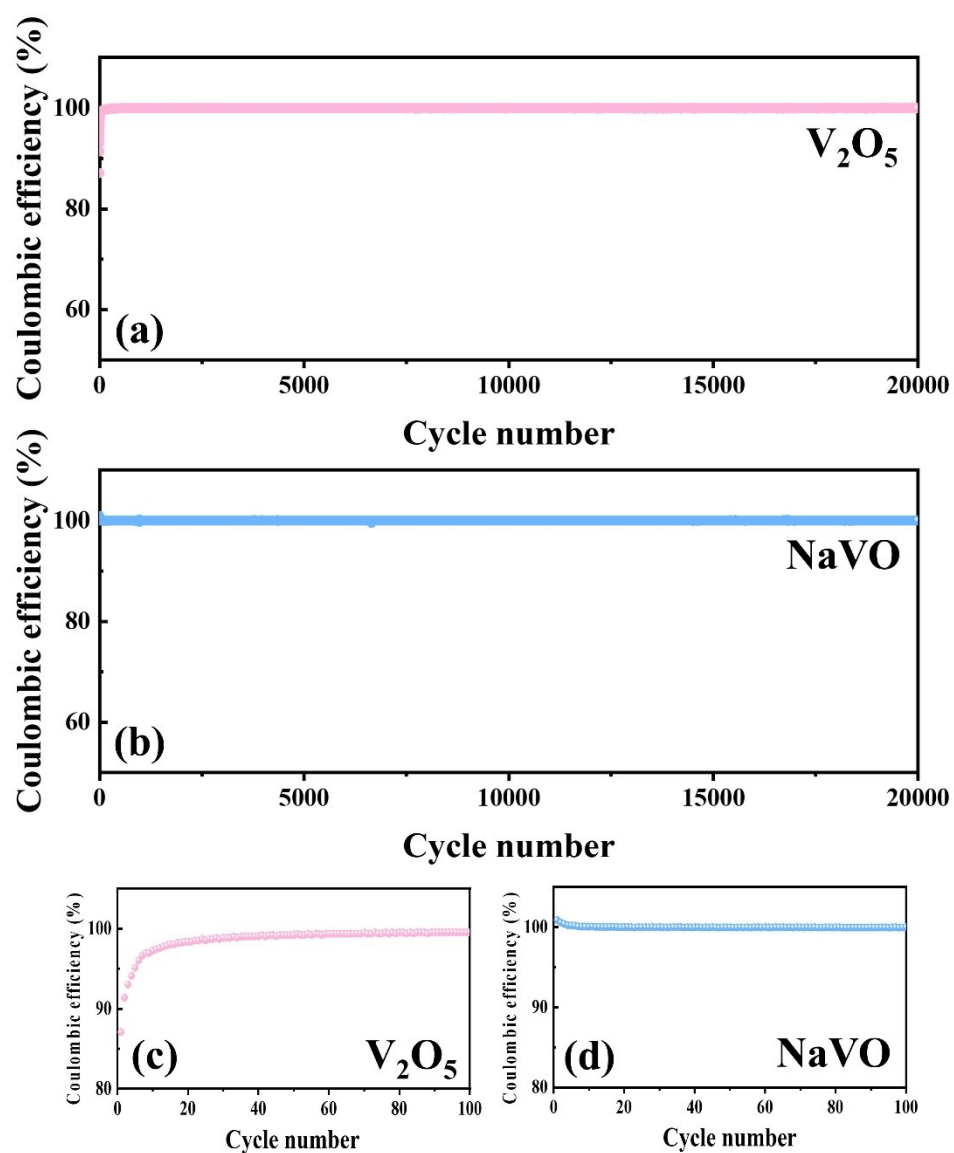

**Figure. S8** Coulombic efficiency of (a) NaVO and (b)  $V_2O_5$  for 10000 cycles. Coulombic efficiency of (c) NaVO and (d)  $V_2O_5$  for 100 cycles.

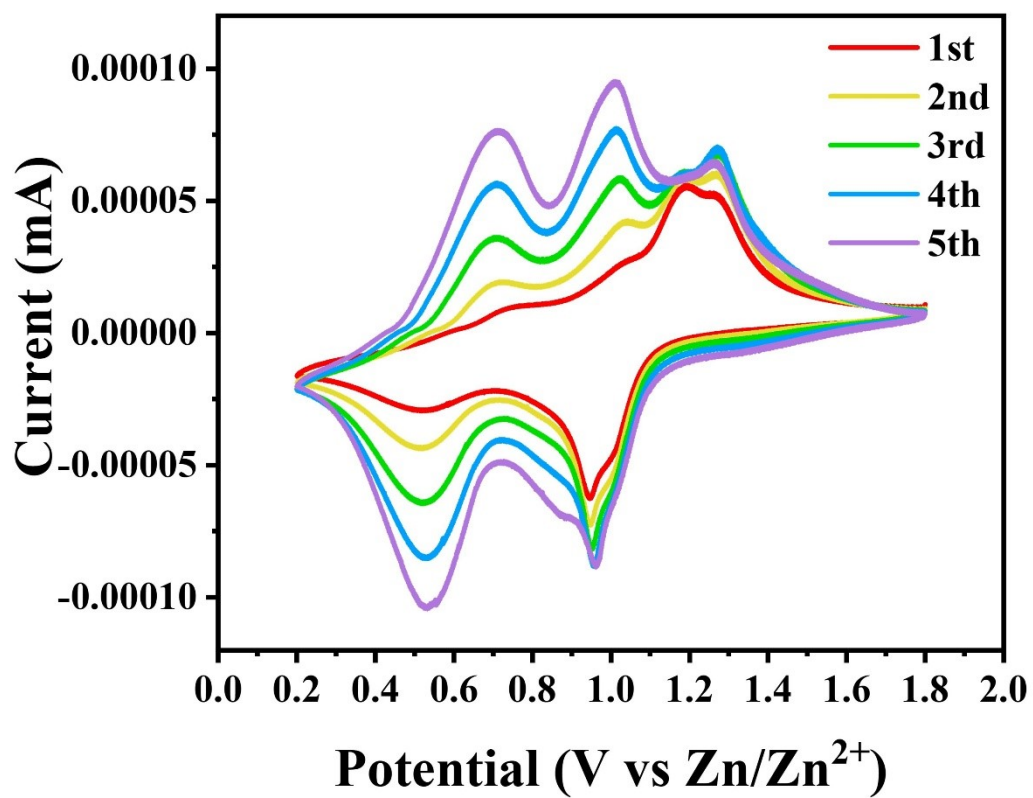

**Figure. S9** CV curves of  $\text{V}_2\text{O}_5//\text{Zn}$  for 5 cycles at scan rates from  $0.1 \text{ mV s}^{-1}$ .

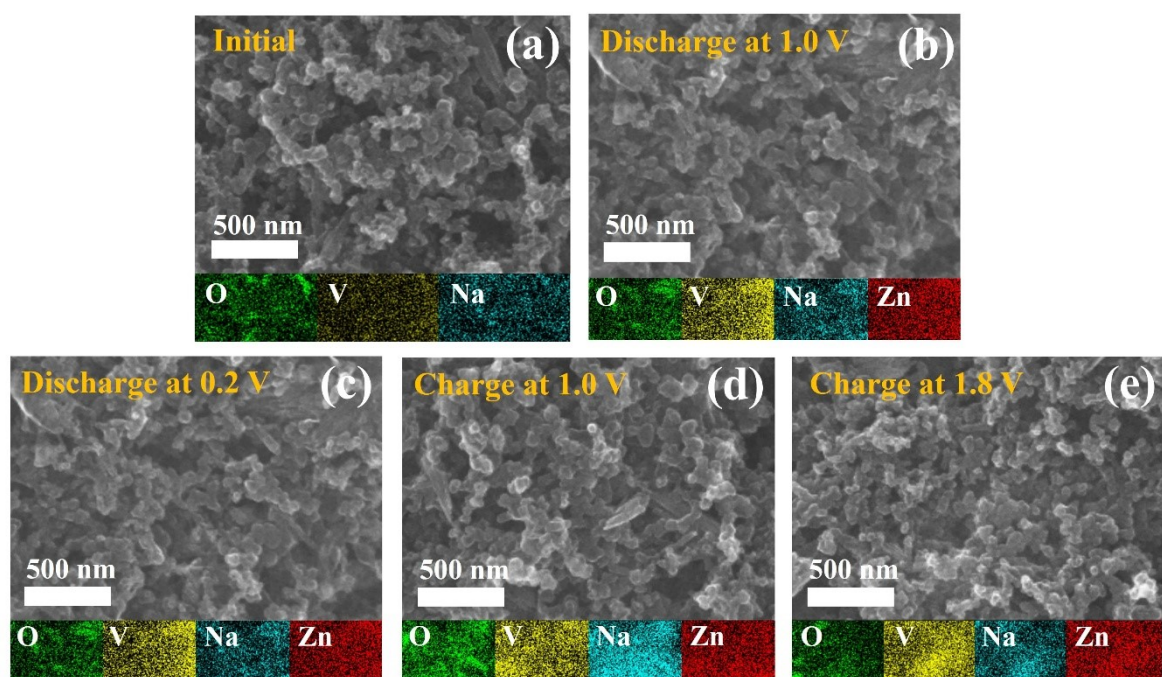

**Figure. S10** SEM images and EDS mapping of NaVO (a) Initial (b) Discharge at 1.0 V (c) Discharge at 0.2 V (d) Charge at 1.0 V and (e) Charge at 0.2 V.

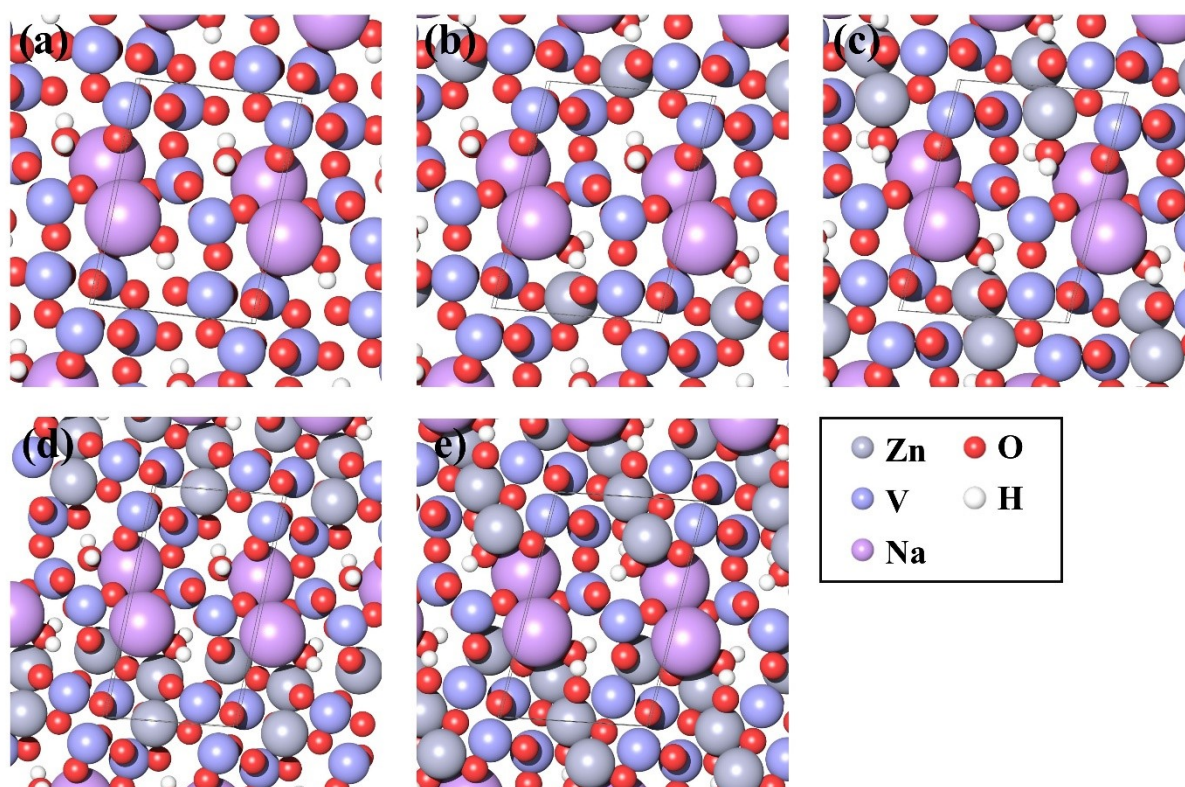

**Figure. S11** Optimized structural configurations of NaVO with Zn intercalation at concentrations of (a) 0, (b) 1, (c) 2, (d) 3, and (e) 4 Zn ions. (Zn: gray, V: blue, Na: violet, O: red, H: white)

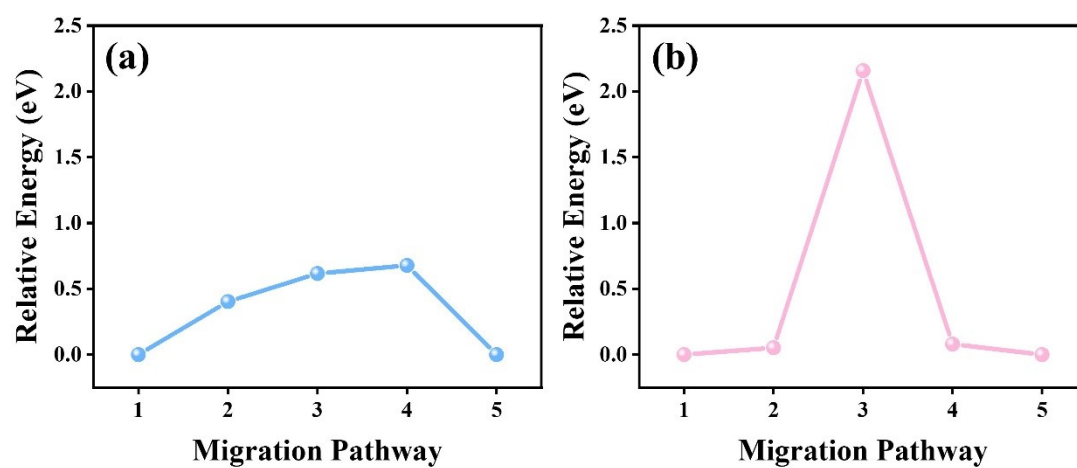

**Figure. S12** Relative energy for Zn ion migration between equivalent sites in (a) NaVO and (b) V<sub>2</sub>O<sub>5</sub> cathodes along the pathway.

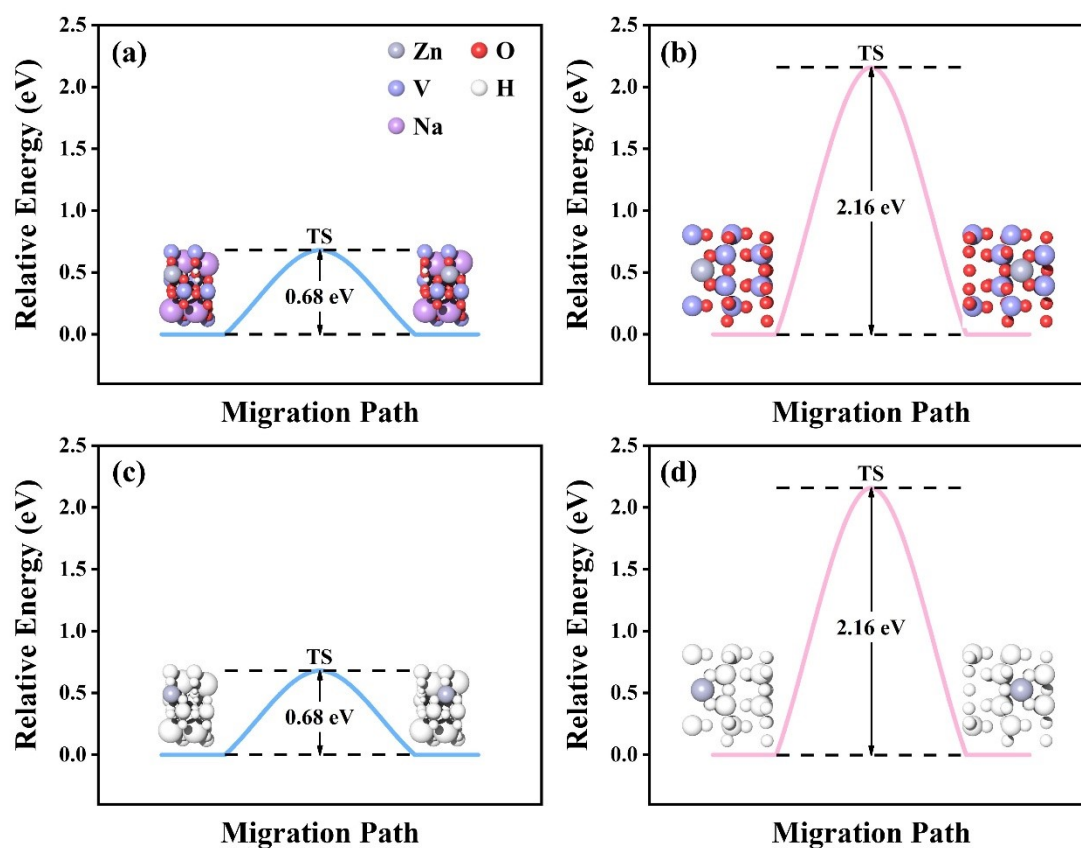

**Figure. S13** Relative energy plot of initial, transition and final state during Zn migration between equivalent sites in (a), (c) NaVO and (b), (d) V<sub>2</sub>O<sub>5</sub> cathodes. (Zn: gray, V: blue, Na: violet, O: red, H: white)

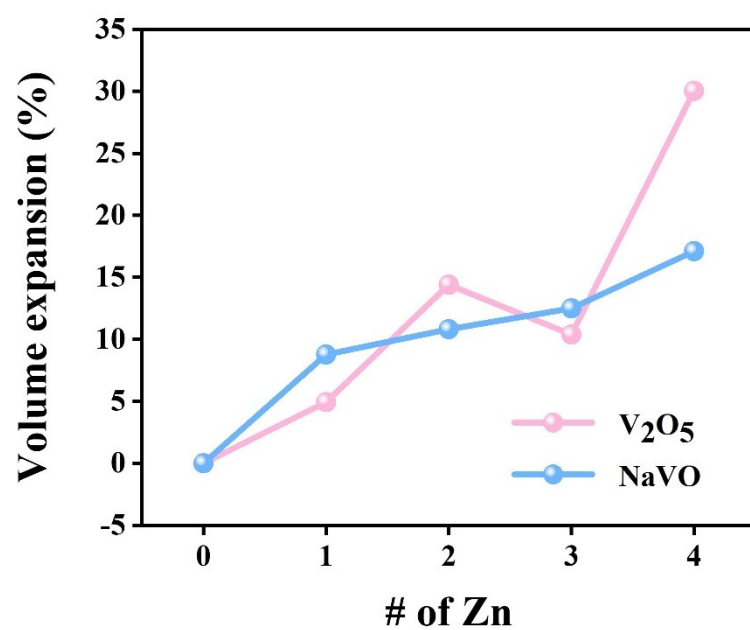

**Figure. S14** Comparison of volume expansion ratio in NaVO and V<sub>2</sub>O<sub>5</sub> cathodes during Zn intercalation.

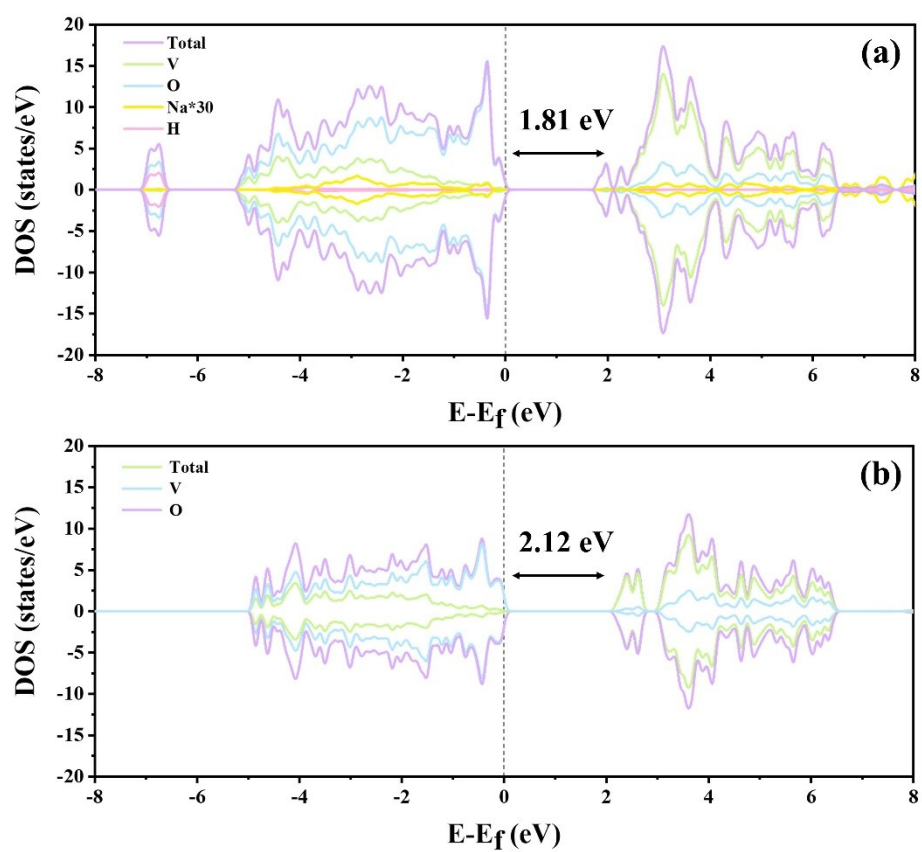

**Figure. S15** Electronic density of states for (a) NaVO and (b)  $V_2O_5$

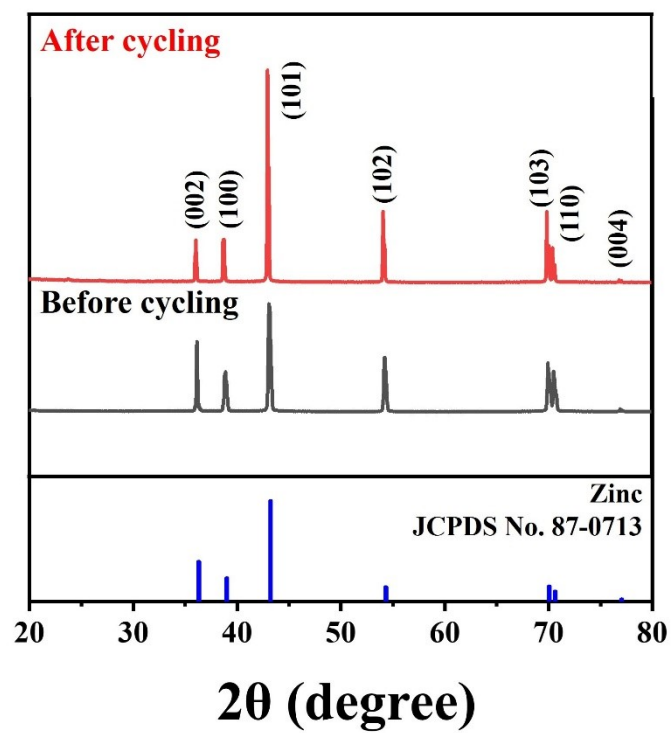

**Figure. S16** The XRD patterns of Zinc Anode before and after cycling.

| <b>V<sub>2</sub>O<sub>5</sub></b> | <b>Charge percentage (%)</b> | <b>Volume (Å<sup>3</sup>)</b> | <b>Volume expansion (%)</b> |
|-----------------------------------|------------------------------|-------------------------------|-----------------------------|
| <b>0 Zn</b>                       | 100                          | 183.005                       | 0                           |
| <b>1 Zn</b>                       | 75                           | 192.051                       | 4.94                        |
| <b>2 Zn</b>                       | 50                           | 209.354                       | 14.40                       |
| <b>3 Zn</b>                       | 25                           | 202.005                       | 10.38                       |
| <b>4 Zn</b>                       | 0                            | 237.972                       | 30.04                       |

| <b>NaVO</b> | <b>Charge percentage (%)</b> | <b>Volume (Å<sup>3</sup>)</b> | <b>Volume expansion (%)</b> |
|-------------|------------------------------|-------------------------------|-----------------------------|
| <b>0 Zn</b> | 100                          | 331.857                       | 0                           |
| <b>1 Zn</b> | 75                           | 360.952                       | 8.77                        |
| <b>2 Zn</b> | 50                           | 367.730                       | 10.81                       |
| <b>3 Zn</b> | 25                           | 373.357                       | 12.50                       |
| <b>4 Zn</b> | 0                            | 388.608                       | 17.10                       |

**Table S1.** Comparison of volume expansion ratio in NaVO and V<sub>2</sub>O<sub>5</sub> cathodes during Zn intercalation.

| Cathode Material                                                     | Electrolyte                                        | Synthetic method                   | Voltage range (V) | Specific Capacity (mAh g <sup>-1</sup> ) | Cycling performance (cycles) | Reference |
|----------------------------------------------------------------------|----------------------------------------------------|------------------------------------|-------------------|------------------------------------------|------------------------------|-----------|
| Na <sub>2</sub> V <sub>6</sub> O <sub>16</sub> ·2H <sub>2</sub> O    | Zn(CF <sub>3</sub> SO <sub>3</sub> ) <sub>2</sub>  | Sonochemical                       | 0.2-1.8           | 126.3 at 10 A g <sup>-1</sup>            | 10000                        | This work |
| Na <sub>2</sub> V <sub>6</sub> O <sub>16</sub> ·3H <sub>2</sub> O    | Zn(ClO <sub>4</sub> ) <sub>2</sub> /PC             | hydrothermal                       | 0.2-1.7           | 142 at 5 A g <sup>-1</sup>               | 5000                         | [1]       |
| Na <sub>2</sub> V <sub>6</sub> O <sub>16</sub> ·2.14H <sub>2</sub> O | ZnSO <sub>4</sub> /Na <sub>2</sub> SO <sub>4</sub> | hydrothermal                       | 0.2-1.6           | 116 at 20 A g <sup>-1</sup>              | 2000                         | [2]       |
| Na <sub>2</sub> V <sub>6</sub> O <sub>16</sub> ·1.66H <sub>2</sub> O | ZnSO <sub>4</sub> /Na <sub>2</sub> SO <sub>4</sub> | hydrothermal                       | 0.2-1.6           | 102 at 5 A g <sup>-1</sup>               | 1800                         | [3]       |
| Na <sub>2</sub> V <sub>6</sub> O <sub>16</sub> ·3H <sub>2</sub> O    | ZnSO <sub>4</sub>                                  | Microwave-Assisted<br>Hydrothermal | 0.4-1.4           | 152 at 15 A g <sup>-1</sup>              | 1000                         | [4]       |

**Table S2.** Comparison of this work with previous studies on Zn-ion battery cathodes

[1] Tan, Huiteng, et al., Free-Standing Hydrated Sodium Vanadate Papers for High-Stability Zinc-Ion Batteries. *Batteries & Supercaps* 3.3 (2020): 254-260.

[2] Hu, Fang, et al., Na<sub>2</sub>V<sub>6</sub>O<sub>16</sub>·2.14H<sub>2</sub>O nanobelts as a stable cathode for aqueous zinc-ion batteries with long-term cycling performance. *Journal of Energy Chemistry* 38 (2019): 185-191.

[3] Qin, Liping, et al., Improved working voltage and high rate performance of sodium vanadate cathode materials for aqueous zinc ion batteries by altering synthetic solution pH guiding the structure change. *Materials Today Communications* 31 (2022): 103460.

[4] Soundharrajan, Vaiyapuri, et al., Na<sub>2</sub>V<sub>6</sub>O<sub>16</sub>·3H<sub>2</sub>O barnesite nanorod: an open door to display a stable and high energy for aqueous rechargeable Zn-ion batteries as cathodes. *Nano letters* 18.4 (2018): 2402-2410.
